# Supplementary material for: Deep Sequencing Reveals Differences in the Transcriptional Landscapes of Fibers from Two Cultivated Species of Cotton
Source: PLoS One. 2012 Nov 15;7(11):e48855. doi: 10.1371/journal.pone.0048855 (PMC3499527; doi:10.1371/journal.pone.0048855)
Supplement: Table S2 — Results of the level 2 and 3 GO term assignment by Blast2GO. (XLS) [file pone.0048855.s004.xls]

## Sheet: Add_Table
Table S2: Results of the level 2 and 3 GO term assignment by Blast2GO
Level 2
Category	No.		Category	No.		Category	No.
binding	17744		cellular process	15747		cell	24574
catalytic activity	14959		metabolic process	13497		organelle	17568
transporter activity	2354		response to stimulus	6636		macromolecular complex	4677
structural molecule activity	1787		biological regulation	4380		membrane-enclosed lumen	1376
molecular transducer activity	924		localization	4013		extracellular region	1291
transcription regulator activity	740		developmental process	3399		symplast	38
enzyme regulator activity	504		multicellular organismal process	3237		Total	49524
electron carrier activity	495		cellular component organization	3200
antioxidant activity	226		signaling	1972
nutrient reservoir activity	116		cellular component biogenesis	1750
Total	39849		reproduction	1491
			multi-organism process	1377
			growth	939
			cell wall organization or biogenesis	608
			immune system process	439
			death	267
			rhythmic process	141
			cell proliferation	133
			viral reproduction	59
			locomotion	59
			biological adhesion	53
			pigmentation	31
			Total	63428
Level 3
Category	No.		Category	No.		Category	No.
nucleotide binding	5907		cellular metabolic process	11292		cell part	24574
hydrolase activity	5853		primary metabolic process	11205		membrane-bounded organelle	16115
transferase activity	5325		macromolecule metabolic process	6826		organelle part	6823
protein binding	5212		biosynthetic process	5729		protein complex	3447
ion binding	4724		nitrogen compound metabolic process	5343		non-membrane-bounded organelle	3081
nucleic acid binding	4138		small molecule metabolic process	4621		vesicle	2090
nucleoside binding	3634		response to stress	4041		apoplast	668
oxidoreductase activity	2479		response to chemical stimulus	4009		extracellular region part	90
substrate-specific transporter activity	1714		establishment of localization	3919		protein-DNA complex	72
transmembrane transporter activity	1714		regulation of biological process	3424		Total	56960
ligase activity	1121		multicellular organismal development	3093
signal transducer activity	924		response to abiotic stimulus	2943
structural constituent of ribosome	830		catabolic process	2833
lyase activity	680		anatomical structure development	2619
cofactor binding	511		response to endogenous stimulus	1879
carbohydrate binding	501		cellular response to stimulus	1776
tetrapyrrole binding	499		macromolecule localization	1485
isomerase activity	486		organelle organization	1463
lipid binding	319		reproductive process	1458
vitamin binding	296		signaling pathway	1442
nucleoside-triphosphatase regulator activity	236		regulation of biological quality	1394
structural constituent of cytoskeleton	201		cellular localization	1364
enzyme activator activity	199		cellular component assembly	1273
transcription activator activity	184		macromolecular complex subunit organization	1213
peroxidase activity	169		cellular macromolecular complex subunit organization	1129
carboxylic acid binding	155		cellular developmental process	1099
metal cluster binding	150		response to biotic stimulus	1059
transcription repressor activity	124		protein complex biogenesis	1049
phosphatase regulator activity	92		microtubule-based process	1036
chromatin binding	82		response to other organism	995
amine binding	82		signaling process	755
peptide binding	81		developmental growth	647
oxygen binding	69		cell cycle	540
enzyme inhibitor activity	67		secondary metabolic process	516
two-component response regulator activity	66		response to external stimulus	512
transcription cofactor activity	63		cell communication	493
kinase regulator activity	52		immune response	427
RNA polymerase II transcription factor activity	48		oxidation reduction	427
xenobiotic transporter activity	44		cell wall organization	384
ribonucleoprotein binding	36		cellular cell wall organization or biogenesis	379
superoxide dismutase activity	35		plant-type cell wall organization or biogenesis	370
drug binding	34		cell division	358
hormone binding	28		regulation of molecular function	340
cofactor transporter activity	25		cellular homeostasis	302
cyclase activity	24		ribonucleoprotein complex biogenesis	277
transcription initiation factor activity	23		cell death	267
small protein activating enzyme activity	22		cell wall biogenesis	266
pattern binding	21		pigment metabolic process	255
structural constituent of chromatin	20		actin filament-based process	245
deaminase activity	18		membrane organization	239
alcohol binding	15		cellular membrane organization	239
transcription elongation regulator activity	14		organophosphate metabolic process	223
UDP-L-rhamnose synthase activity	12		aging	215
demethylase activity	12		developmental maturation	204
Total	49370		external encapsulating structure organization	167
			multicellular organism reproduction	148
			stomatal movement	146
			sexual reproduction	142
			circadian rhythm	140
			DNA conformation change	136
			tropism	130
			detection of stimulus	116
			interspecies interaction between organisms	97
			DNA packaging	91
			hormone metabolic process	85
			genetic transfer	64
			cellular component disassembly	60
			cell adhesion	53
			viral reproductive process	46
			organic substance metabolic process	42
			behavior	39
			chromosome segregation	38
			cell-cell signaling	38
			pigment accumulation	31
			dormancy process	31
			pigment accumulation in tissues	30
			organ growth	28
			taxis	27
			cell recognition	23
			extracellular structure organization	21
			secondary growth	19
			multicellular organismal movement	15
			cell projection organization	15
			cellular component movement	12
			system process	12
			intraspecies interaction between organisms	12
			cytokine production	11
			Total	103956
