# Supplementary material for: Deep Sequencing Reveals Differences in the Transcriptional Landscapes of Fibers from Two Cultivated Species of Cotton
Source: PLoS One. 2012 Nov 15;7(11):e48855. doi: 10.1371/journal.pone.0048855 (PMC3499527; doi:10.1371/journal.pone.0048855)
Supplement: Table S3 — Ten most represented KEGG pathways (number of sequences). (XLS) [file pone.0048855.s005.xls]

## Sheet: Feuil1
Table S3: Ten most represented KEGG pathways (number of sequences)
KEGG Pathway	No sequences in Pathway
Metabolic pathways	4,470
Biosynthesis of secondary metabolites	2,103
Microbial metabolism in diverse environments	1,250
Biosynthesis of plant hormones	881
Biosynthesis of phenylpropanoids	783
Starch and sucrose metabolism	762
Biosynthesis of alkaloids derived from shikimate pathway	556
Biosynthesis of terpenoids and steroids	553
Biosynthesis of alkaloids derived from histidine and purine	519
Biosynthesis of alkaloids derived from ornithine, lysine and nicotinic acid	518
Biosynthesis of alkaloids derived from terpenoid and polyketide	503
Oxidative phosphorylation	502
