# Supplementary material for: Deep Sequencing Reveals Differences in the Transcriptional Landscapes of Fibers from Two Cultivated Species of Cotton
Source: PLoS One. 2012 Nov 15;7(11):e48855. doi: 10.1371/journal.pone.0048855 (PMC3499527; doi:10.1371/journal.pone.0048855)
Supplement: Table S10 — Sequences of the 48 triplets of primers used for SNP genotyping, including SNP name as used in mapping, Contig id, product size as from EST assembly (may differ from PCR product size from genomic DNA). (XLS) [file pone.0048855.s012.xls]

## Sheet: Table48triplets
Table S10: Sequences of the 48 triplets of primers used for SNP genotyping, including SNP name as used in mapping, Contig id, product size as from EST assembly (may differ from PCR product size from genomic DNA)
SNP	Contig ('_REV' when primers designed from reverse sequence)	snp position	Gua allele	VH8 allele	primerF1 (last=SNP as in contig, can be Gua or VH8)	primer F_Gua (variable 5 nt tail in red color, SNP and mismatch in bold/underline)	primer F_VH8 (variable 15 nt tail in red color, SNP and mismatch in bold/underline)	primer R	product bp	TmF	TmR
SNP1	Contig_23072_bb_REV	1704	T	C	CGACATGCAAGAAGAAGGAGAT	GCCACCGACATGCAAGAAGAAGGCGAT	AATTGGATAGGCGACCGACATGCAAGAAGAAGGGGAC	TTTTCAAACGCAACAAGCAC	175	61	60
SNP2	Contig_26800_bb	1021	G	T	ATGATATCCCAACTTTGCCT	GCCACATGATATCCCAACTTTACCG	TGAGGTTACGAGCCTATGATATCCCAACTTTTCCT	AGCAATCCTGTTGTCGAACC	149	56	60
SNP3	Contig_26848_bb	679	C	A	GTGTTCCTCATGTTGTAGGC	GCGGGGTGTTCCTCATGTTGTGGGC	TGCGGGATAGGCGACGTGTTCCTCATGTTGTCGGA	TTTGCTTCGACATTGATGCT	229	56	60
SNP4	Contig_27026_bb	695	T	C	TCCCATTTGTCCCAATCTCT	GCCACTCCCATTTGTCCCAATATCT	TGAGGTTACGAGCCTTCCCATTTGTCCCAATTTCC	GGACACCAGTTTCAACACGA	216	59	60
SNP5	Contig_27860_bb_REV	1265	G	C	AGGGTTCATTGTGAAGGAACTAG	GCCACAGGGTTCATTGTGAAGGAAATAG	TGCGGGATAGGCGACAGGGTTCATTGTGAAGGAATTAC	AACATGAAGCAGAACACCACA	151	59	59
SNP6	Contig_32067_bb	1022	C	A	GCCAAATAACAAACAAGAGAAAC	GCCACGCCAAATAACAAACAAGAGCAAC	TGAGGTTACGAGCCTGCCAAATAACAAACAAGAGGAAA	CATGGTGGATGGATGATGAA	242	57	60
SNP7	Contig_33456_bb	365	C	T	CCCGAGAAAGTTAAGGGTGT	CGATCCCCGAGAAAGTTAAGGATGC	GAAGAAAGGTGGGAGCCCGAGAAAGTTAAGGTTGT	CCGTTTTGACCAACCCATAC	131	58	60
SNP8	Contig_33511_bb_REV	498	G	T	ACATGCTACCCTTTTCACCG	GCCACACATGCTACCCTTTTCCCCG	TGCGGGATAGGCGACACATGCTACCCTTTTCGCCT	GGCCAAAGAATCAGGTGCT	245	60	60
SNP9	Contig_34377_bb	430	G	C	GTTCTGGAGCTGGATCTTTC	GCCACGTTCTGGAGCTGGATCCTTG	TGCGGGATAGGCGACGTTCTGGAGCTGGATCGTTC	TGCAAACTGCACCTCTATTCC	156	56	60
SNP10	Contig_35951_bb	283	TC	C	ATTCGACGTGCCCTTTTAGC	GCCACATTCGACGTGCCCTTTCAGT	TGCGGGATAGGCGACATTCGACGTGCCCTTTGAGC	CTTCGGGAAAGAAGAACGTG	194	61	60
SNP11	Contig_37983_bb_REV	935	C	T	GCAGTGGTGGTCCATCTTCT	GCCACGCAGTGGTGGTCCATCCTCC	ATTACGGACGGCAAGGCAGTGGTGGTCCATCGTCT	CCCGACACTGGAGAACAAGT	173	60	60
SNP12	Contig_38860_bb	418	A	T	ATTCTCAGCTTCTTACAAAGGAT	GCCACATTCTCAGCTTCTTACAAAAGAA	TGCGGGATAGGCGACATTCTCAGCTTCTTACAAATGAT	ATTGCACCACTTGAGCCATT	178	56	61
SNP13	Contig_39366_bb_REV	750	C	T	TGGTTGATCCATCTACTCCAC	GCCACTGGTTGATCCATCTACTACAC	TGCGGGATAGGCGACTGGTTGATCCATCTACTTCAT	CTTCTCCCCCATTATCAGCA	185	57	60
SNP14	Contig_41901_bb_REV	1003	C	T	TAGCTGGAAAGATTGTCCAC	GCCACTAGCTGGAAAGATTGTACAC	TGCGGGATAGGCGACTAGCTGGAAAGATTGTTCAT	AAAGGATCAGCTCACGTTGC	228	55	60
SNP15	Contig_42665_bb	1087	G	AG	GGAGTAGCAAGAAAGCTGTCAA	GCCACGGAGTAGCAAGAAAGCTGCCAG	TGCGGGATAGGCGACGGAGTAGCAAGAAAGCTGGCAA	GCTTCTTCCTTTGGTTGTCG	190	59	60
SNP16	Contig_42803_bb	524	TC	C	AGGAATTATACATCAATAGTTGCC	GCCACAGGAATTATACATCAATAGTCGCT	TGCGGGATAGGCGACAGGAATTATACATCAATAGTGGCC	ACCGAATGATCCTCTGGAAG	164	56	59
SNP17	Contig_43877_bb	848	C	G	TGTTGCCCAGCATATTACTAAG	GCCACTGTTGCCCAGCATATTACCAAC	TGCGGGATAGGCGACTGTTGCCCAGCATATTACGAAG	TTGTACCCCACTCCGAAGAC	130	57	60
SNP18	Contig_47445_bb_REV	958	C	TC	TTGTAAGTTCCTTCTCCAAACAC	GCCACTTGTAAGTTCCTTCTCCAACCAC	TGCGGGATAGGCGACTTGTAAGTTCCTTCTCCAAGCAT	CAATGGCAACCCTCAAAGTT	213	57	60
SNP19	Contig_47754_bb_REV	622	C	T	CAGCAGCCAATGATGTGAT	GCCACCAGCAGCCAATGATGCGAC	TGCGGGATAGGCGACCAGCAGCCAATGATGGGAT	GGGTGATGGAACTGAGCATT	192	58	60
SNP20	Contig_48233_bb	657	T	C	ATGGATGGTCGGTGAGATAC	GCCACATGGATGGTCGGTGAGCTAT	TGCGGGATAGGCGACATGGATGGTCGGTGAGGTAC	TACGCAATAAGGCACAATGC	221	57	60
SNP21	Contig_48422_bb	308	C	T	GTTGACAACACTGGAAAATATAAC	GCCACGTTGACAACACTGGAAAATACAAC	TGCGGGATAGGCGACGTTGACAACACTGGAAAATAGAAT	AAGTTATCGGGGCGAAAGAT	182	55	60
SNP22	Contig_49921_bb	526	G	A	CGCTGCCATCATACATCAAG	GCCACCGCTGCCATCATACATAAAG	TGAGGTTACGAGCCTCGCTGCCATCATACATTAAA	GCATGGTGACATGAATTTGG	188	60	60
SNP23	Contig_51016_bb	878	C	T	AAGTAAAGGTAGGCACTCTTTCTC	GCCACAAGTAAAGGTAGGCACTCTTCCTC	TGCGGGATAGGCGACAAGTAAAGGTAGGCACTCTTGCTT	CTTGTTCAAGGTGGGCTCAT	173	57	60
SNP24	Contig_51213_bb	642	G	A	GTCTTTCAACATTGCTTCCG	GCGGGGTCTTTCAACATTGCTCCCG	TGAGGTTACGAGCCTGTCTTTCAACATTGCTGCCA	TTAACAACTCCACCGACGTG	246	58	60
SNP25	Contig_5257_bb_REV	1157	C	A	ATGCCCCAGTGAACTACCC	GCCACATGCCCCAGTGAACTCCCC	TGCGGGATAGGCGACATGCCCCAGTGAACTGCCA	CCAATGATGCAACCTAAAAGG	233	60	59
SNP26	Contig_53096_bb_REV	742	G	A	GGTGATGAAAATGAAAGGTCG	GCCACGGTGATGAAAATGAAAGATCG	TGCGGGATAGGCGACGGTGATGAAAATGAAAGTTCA	CATCGCTAACATCCGAGTCA	235	59	60
SNP27	Contig_53370_bb_REV	982	A	G	AGGCGTTGTGTTTGTTCAGG	GCCACAGGCGTTGTGTTTGTTAAGA	TGCGGGATAGGCGACAGGCGTTGTGTTTGTTTAGG	ATTGGTGCCAACTTTGCTTC	155	61	60
SNP28	Contig_53515_bb	718	A	G	ACCGCAATATAAGGAAAGCA	GCCACACCGCAATATAAGGAACGCA	GAAGAAAGGTGGGAGACCGCAATATAAGGAAGGCG	CCTGTTAAGTGTCGCAAGCA	158	57	60
SNP29	Contig_54096_bb_REV	964	T	C	TTCTCCCACCATTTCTGAAT	GCCACTTCTCCCACCATTTCTAAAT	TGAGGTTACGAGCCTTTCTCCCACCATTTCTTAAC	GAAGGTGGAACTTGTTTGGTTC	227	57	59
SNP30	Contig_54220_bb	541	T	C	CCCCTATTGAGTCTGGTTGC	GCCACCCCCTATTGAGTCTGGCTGT	TGCGGGATAGGCGACCCCCTATTGAGTCTGGGTGC	CTCTTCTTGAGGCTGCCAAG	193	60	60
SNP31	Contig_55999_bb	1103	C	T	TTCTTCACTCCTCTGTCTCCTC	GCCACTTCTTCACTCCTCTGTCTACTC	TGCGGGATAGGCGACTTCTTCACTCCTCTGTCTTCTT	GGCTCACCATCACGAAAATC	180	58	60
SNP32	Contig_9663_bb_REV	1620	C	A	TCAAACAAACTCGGTTTTGAA	GCCACTCAAACAAACTCGGTTTCGAC	TGCGGGATAGGCGACTCAAACAAACTCGGTTTGGAA	CATCACCACTCTAGGCTTCCA	248	58	60
SNP33	step1_rep_c47678	967	C	T	GGACTTGAGGATTCTGTGTGTAC	GCCACGGACTTGAGGATTCTGTGTATAC	TGCGGGATAGGCGACGGACTTGAGGATTCTGTGTTTAT	TTTACTACACAAGAAGAAAAAGCATGT	102	58	59
SNP34	Contig_23539_bb-REV	1049	G	T	TCCTCTGTTCTTTGTTTCCG	GCCACTCCTCTGTTCTTTGTTCCCG	TGAGGTTACGAGCCTTCCTCTGTTCTTTGTTGCCT	GGCTGAGCTTGAGGAGATTG	237	58	60
SNP35	Contig_17671_bb	768	C	A	GGAGTCATCCACGGGATCA	GCCACGGAGTCATCCACGGGCTCC	TGCGGGATAGGCGACGGAGTCATCCACGGGGTCA	CGCTGGATTCTTCAACCTGT	150	62	60
SNP36	Contig_17742_bb	304	T	C	TGGAAGAAGCCAGAGATGGT	GCCACTGGAAGAAGCCAGAGACGGT	TGCGGGATAGGCGACTGGAAGAAGCCAGAGAGGGC	GGTCCAAGTGGTGGGATTTA	186	60	60
SNP37	Contig_19300_bb	607	C	G	GGAGCATTCGTTCAGCCTG	GCCACGGAGCATTCGTTCAGACTC	GAAGAAAGGTGGGAGGGAGCATTCGTTCAGTCTG	TCTCGAAGAAATTGGCAAGG	193	62	60
SNP38	Contig_1931_bb_REV	1014	T	G	TTGAAGTAGACACGAATAATGGAT	GCCACTTGAAGTAGACACGAATAATAGAT	TGCGGGATAGGCGACTTGAAGTAGACACGAATAATTGAG	GGTGATGAATCGCCTGATCT	225	57	60
SNP39	Contig_23308_bb	406	C	T	GGGTTTCTTTCCTTGAAGAGACT	GCGGGGGGTTTCTTTCCTTGAAGAAACC	TGCGGGATAGGCGACGGGTTTCTTTCCTTGAAGATACT	AAAGGTGATGGCAAAGATGC	229	59	60
SNP40	Contig_26940_bb_REV	1822	C	T	GCTTGACGATGAAAACTACAAC	GCCACGCTTGACGATGAAAACTAAAAC	TGCGGGATAGGCGACGCTTGACGATGAAAACTATAAT	CTTCAAATGGGAAAGGACGA	227	56	60
SNP41	Contig_28608_bb	607	A	G	TGTTTAATGTACCGTGGAGACA	GCCACTGTTTAATGTACCGTGGAAACA	TGCGGGATAGGCGACTGTTTAATGTACCGTGGATACG	GTCGATTCGGGAGAAAACCT	231	58	60
SNP42	Contig_31630_bb_REV	380	A	G	GCTAGAATGTAGTAAAAGTAATCCAA	GCCACGCTAGAATGTAGTAAAAGTAATACAA	TGCGGGATAGGCGACGCTAGAATGTAGTAAAAGTAATTCAG	ACAAGCAGTTCCCTGAGCAT	190	55	60
SNP43	Contig_35872_bb_REV	1148	C	T	CGAAGATTTTCCAGTTCAAAGAC	GCCACCGAAGATTTTCCAGTTCAACGAC	TGCGGGATAGGCGACCGAAGATTTTCCAGTTCAAGGAT	CACCGCTCTTCCCTTGATAC	171	59	60
SNP44	Contig_55680_bb	575	G	A	TTCATCCCAGAAATCCAAGTA	GCCACTTCATCCCAGAAATCCACGTG	TGAGGTTACGAGCCTTTCATCCCAGAAATCCAGGTA	GGCGGTAGCTTCTATGAGGA	202	57	59
SNP45	Contig_56175_bb_REV	1791	C	A	AGGGTATCCCAAAACATTGTC	GCCACAGGGTATCCCAAAACATCGTC	ATTACGGATGGCAAGAGGGTATCCCAAAACATGGTA	CCCCGTACTCAGTTTTCGAG	227	58	60
SNP46	step1_rep_c48031	1437	A	C	GAACTTTGCTTTGTTCTAATGGA	GCCACGAACTTTGCTTTGTTCTAACGGA	TGCGGGATAGGCGACGAACTTTGCTTTGTTCTAAGGGC	TGGTACATGGATTCCTGATGA	204	58	59
SNP47	step1_rep_c48885_REV	897	T	C	CGATTCCAGCTCGATATTCC	GCCACCGATTCCAGCTCGATACTCT	TGCGGGATAGGCGACCGATTCCAGCTCGATAGTCC	TTCAACAATGGCTTGAGCTG	220	60	60
SNP48	Contig_10813_bb_REV	851	G	T	GCATCACACGGTCATCACTG	GCCACGCATCACACGGTCATCCCTG	GAAGAAAGGTGGGAGGCATCACACGGTCATCGCTT	TTACTTGGGGACTTCGGTTG	226	61	60
